# Supplementary material for: Two forms of ribosomal protein L2 of Escherichia coli that inhibit DnaA in DNA replication
Source: PubMed Central journal article supplement — Nucleic Acids Res. 2011 Feb 2;39(10):4180–91. doi: 10.1093/nar/gkq1203 (PMC3105425; doi:10.1093/nar/gkq1203), 2011-02-02
Supplement: supp_gkq1203_Supplementary_Figures.pdf [file supp_gkq1203_Supplementary_Figures.pdf]

Supplementary Figure 1

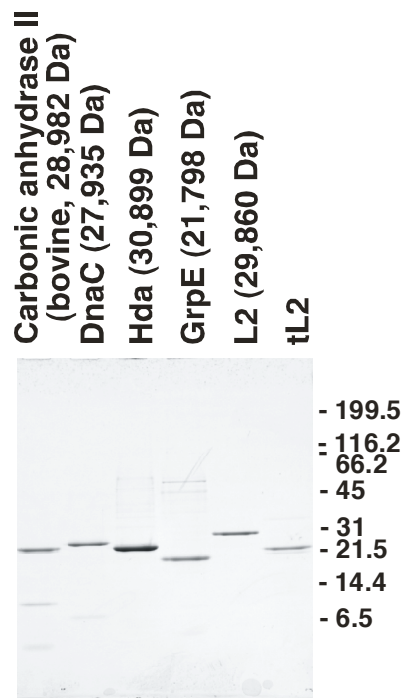

Supplementary Figure 2

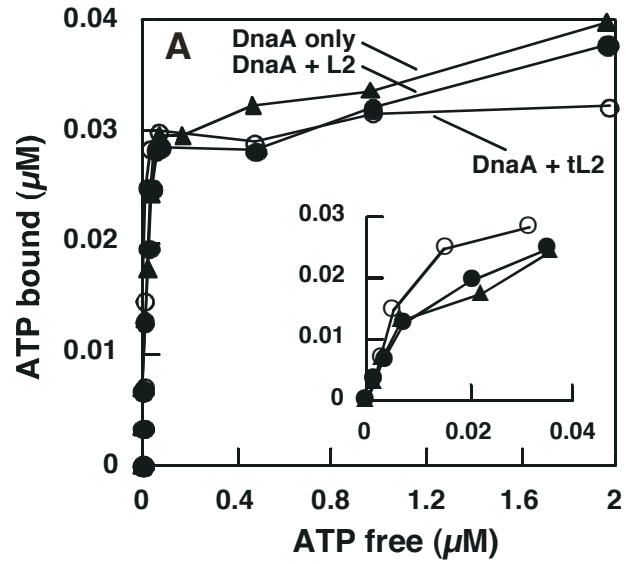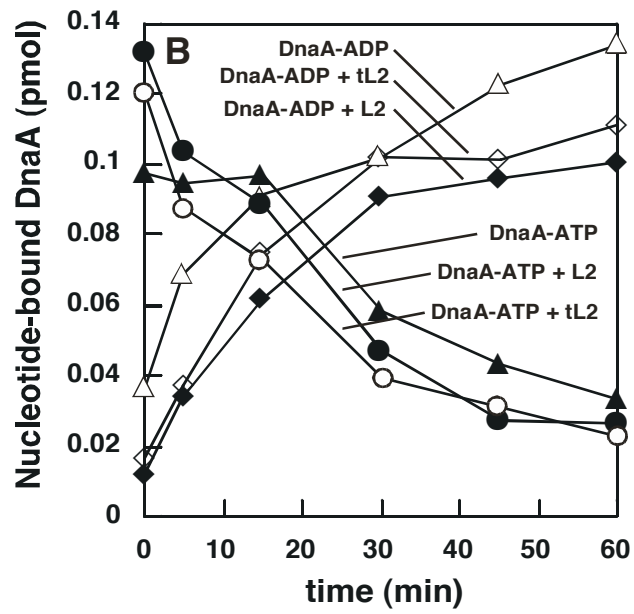

Supplementary Figure 3

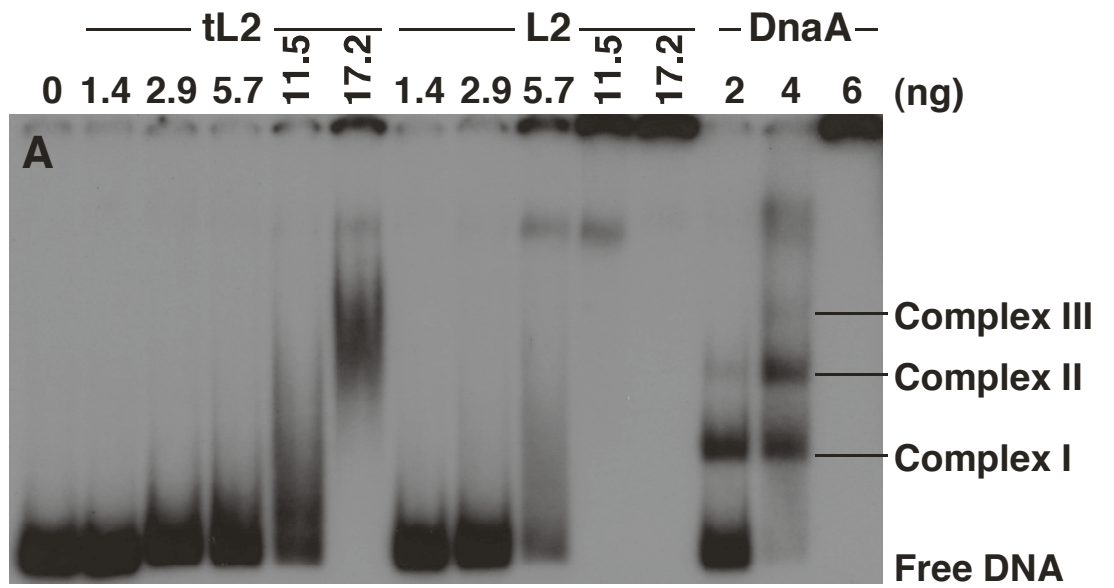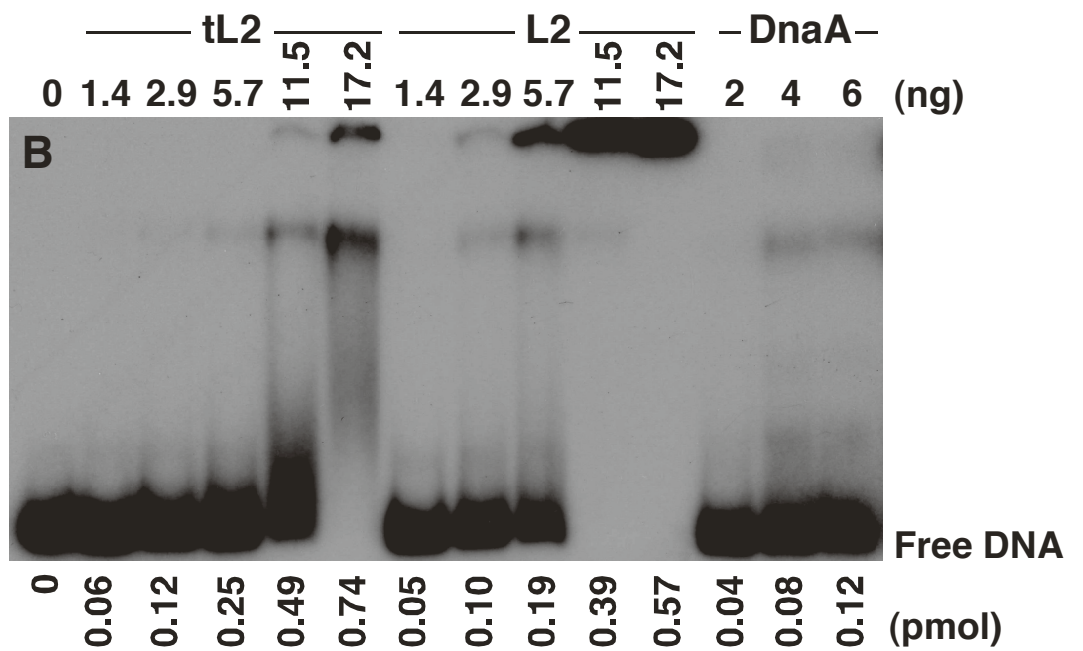

Supplementary Figure 1. Bovine carbonic anhydrase II (0.4  $\mu\text{g}$ ), DnaC (0.4  $\mu\text{g}$ ), Hda (0.78  $\mu\text{g}$ ) joined at its N-terminus to the amino acid sequence MGHHHHHHHHHSSGHIQGRH, GrpE (0.3  $\mu\text{g}$ ), L2 (0.38  $\mu\text{g}$ ), and the protein isolated in Figure 1 (0.57  $\mu\text{g}$ ) were visualized by staining with Coomassie blue after electrophoresis in a 15% SDS-polyacrylamide gel. Except for Hda, the predicted mass of the respective proteins assumes that the N-terminal methionine has not been removed. The molecular weight markers (Bio-Rad prestained SDS-PAGE Standards, Broad Range) shown at the right border are myosin (199.5 kDa),  $\beta$ -galactosidase (116.2 kDa), bovine serum albumin (66.2 kDa), ovalbumin (45 kDa), carbonic anhydrase (31 kDa), soybean trypsin inhibitor (21.5 kDa), lysozyme (14.4 kDa), and aprotinin (6.5 kDa).

Supplementary Figure 2. *Neither form of L2 substantially affects ATP binding or ATP hydrolysis by DnaA.* In **(A)**, reactions (25  $\mu\text{l}$ ) were assembled essentially as described (69), and contained DnaA (2 pmol; 100 ng), [ $\alpha^{32}\text{P}$ ]-ATP ( $1.5 \times 10^5$  cpm/pmol) at the indicated concentrations, and tL2 or L2 (each at 170 ng) as indicated in buffer composed of 50 mM Tris-HCl pH 8.0, 15% (v/v) glycerol, 0.5 mM magnesium acetate, and 0.1% Triton X-100. After incubation on ice for 20 min, the reactions were filtered through nitrocellulose filters (Millipore HAWP), which were then washed with 300  $\mu\text{l}$  of the above buffer. The amount of radioactivity retained on the filters was measured by liquid scintillation spectrometry. Dissociation constants and estimated stoichiometries for DnaA ( $K_D$  of about 0.01  $\mu\text{M}$  with or without tL2 or L2, and  $n=0.4$  with DnaA only) were calculated as described (69). The inset shows results obtained at the lower ATP concentrations. In **(B)**, ATPase assays were performed essentially as described (26,44). Reactions (90  $\mu\text{l}$ ) contained 50 mM Tris-HCl pH 8.0, 15% (v/v) glycerol, 2.5 mM magnesium acetate, 0.1% Triton X-100, 7 mM DTT, 5  $\mu\text{M}$  [ $\alpha^{32}\text{P}$ ]-ATP ( $1.5 \times 10^5$  cpm/pmol), and DnaA (10 pmol; 0.5  $\mu\text{g}$ ). After incubation on ice for 15 min, M13oriC2LB5 supercoiled DNA (230 fmol; 1  $\mu\text{g}$ ), and tL2 or L2 (each at 1  $\mu\text{g}$ ) were added as indicated, followed by incubation at 37°C. At the indicated times, 5  $\mu\text{l}$  aliquots were removed and filtered through nitrocellulose filters as described above. The radioactivity on each filter extracted with 1 M formic acid (100  $\mu\text{l}$ ) in a 10  $\mu\text{l}$  aliquot was quantified by liquid scintillation spectrometry. ATP and ADP in another 10  $\mu\text{l}$  aliquot were separated by thin layer chromatography in 1 M formic acid and 0.5 M LiCl to determine the relative amount of ATP hydrolyzed. The plot represents the amount of ATP or ADP extracted from each filter.

Supplementary Figure 3. *tL2 and L2 bind to DNA nonspecifically.* Gel mobility shift assays were performed as described (45) with a 337 base-pair EcoRI DNA fragment (25 fmol) carrying *E. coli oriC* from M13oriC2LB5 DNA **(A)**, or with a 400 base-pair EcoRI-Eco0119I DNA fragment (25 fmol) encoding part of the  $\beta$ -lactamase gene of pUC19 **(B)** in 20 mM HEPES-KOH pH 8, 1 mM EDTA, 5 mM magnesium acetate, 0.5  $\mu\text{M}$  ATP, 4 mM DTT, 0.2% Triton X-100, 0.1 mg/ml BSA, and the indicated amounts of DnaA, tL2 or L2. Both DNAs were 3' end-labeled with [ $\alpha^{32}\text{P}$ ]-dATP and the large fragment of DNA polymerase I. After electrophoresis in a 4.5% polyacrylamide gel, detection was by autoradiography of the dried gels.
